# Supplementary material for: Caring for an Aging Population in a Post-Pandemic World: Emerging Trends in the U.S. Older Adult Care Industry
Source: Atypon-hosted journal article supplement (doi:10.1287/serv.2021.0280), 2021-11-03
Supplement: serv.2021.0280.sm1.docx [file serv.2021.0280.sm1.docx]

# **Appendix I**

**Table 1. Demographic Characteristics: Demand Survey**

|  | *Category* | *Number of Participants* | *Percentage* |
| --- | --- | --- | --- |
| *Age* | 45-55  56-65  66-75  >=76 | 36  47  108  18 | 17.22%  22.49%  51.67%  8.61% |
| *Considering care for others or self?* | Self  Others | 163  46 | 77.99%  22.01% |
| *Immediate Household* | It’s just me  It’s me and my spouse  It’s me and caregiver  I live with more than one family member  I live with extended family members  Other (please specify) | 67  79  3  41  10  9 | 32.06%  37.80%  1.44%  19.62%  4.78%  4.31% |
| *Primary care giver for someone over 60?* | Yes  No | 40  169 | 19.14%  80.86% |
| *Ever received longtime care?* | Yes  No | 19  190 | 9.09%  90.91% |
| *Gender* | Female  Male  Other | 117  91  1 | 55.98%  43.54%  0.48% |
| *Employ Status* | Yes  No  Retired  Prefer not to answer | 97  12  99  1 | 46.41%  5.74%  47.37%  0.48% |
| *Marital Status* | Married  Never married  Divorced/separated  Widowed  Prefer not to answer | 108  27  45  27  2 | 51.67%  12.92%  21.53%  12.92%  0.96% |
| *Education Level* | High school incomplete (grades 9-11)  High school graduate (grade 12 or GED certificate)  Technical, trade, or vocational school after high school  Some college, no 4-year degree (including Associate)  College graduate (BS, BA, or other 4-year degree)  Post-grad training or professional schooling after college | 1  30  19  69  56  34 | 0.48%  14.35%  9.09%  33.01%  26.79%  16.27% |
| *Race* | Hispanic or Latino  White or Caucasian  Black or African-American  American Indian, Aleut, Eskimo  Asian or Pacific Islander  Other  Prefer not to answer | 5  190  4  0  6  2  2 | 2.39%  90.91%  1.91%  0.00%  2.87%  0.96%  0.96% |
| *Household Income* | Less than $10,000  $10,000 - $19,999  $20,000 - $29,999  $30,000 - $39,999  $40,000 - $49,999  $50,000 - $74,999  $75,000 - $99,999  $100,000 - $149,999  $150,000 - $199,999  More than $200,000  Prefer not to answer | 3  27  24  28  19  49  20  17  10  6  6 | 1.44%  12.92%  11.48%  13.40%  9.09%  23.44%  9.57%  8.13%  4.78%  2.87%  2.87% |
